# Supplementary material for: A low-cost, battery-powered acoustic trap for surveilling male Aedes aegypti during rear-and-release operations
Source: PLoS One. 2018 Aug 2;13(8):e0201709. doi: 10.1371/journal.pone.0201709 (PMC6072092; doi:10.1371/journal.pone.0201709)
Supplement: S1 Table — (XLSX) [file pone.0201709.s001.xlsx]

## Sheet: Data
S1 Table. Latin square collection summary for male and female Aedes aegypti.
Replicate	House	Week	Latin Square	Trap	Female Aedes aegypti	Male Aedes aegypti	Total Aedes aegypti
one	1	one	1	BG	13	7	20
one	1	three	1	GAT	6	0	6
one	1	two	1	Sound GAT	2	5	7
two	1	one	1	BG	4	1	5
two	1	three	1	GAT	3	0	3
two	1	two	1	Sound GAT	1	2	3
one	2	two	1	BG	18	7	25
one	2	one	1	GAT	2	0	2
one	2	three	1	Sound GAT	1	0	1
two	2	two	1	BG	6	4	10
two	2	one	1	GAT	1	0	1
two	2	three	1	Sound GAT	1	1	2
one	3	three	1	BG	3	0	3
one	3	two	1	GAT	0	0	0
one	3	one	1	Sound GAT	0	1	1
two	3	three	1	BG	6	2	8
two	3	two	1	GAT	2	0	2
two	3	one	1	Sound GAT	2	0	2
one	4	one	2	BG	8	5	13
one	4	three	2	GAT	2	0	2
one	4	two	2	Sound GAT	3	6	9
two	4	one	2	BG	7	2	9
two	4	three	2	GAT	4	0	4
two	4	two	2	Sound GAT	1	3	4
one	5	two	2	BG	21	8	29
one	5	one	2	GAT	0	0	0
one	5	three	2	Sound GAT	2	2	4
two	5	two	2	BG	11	4	15
two	5	one	2	GAT	3	0	3
two	5	three	2	Sound GAT	8	26	34
one	6	three	2	BG	6	2	8
one	6	two	2	GAT	1	0	1
one	6	one	2	Sound GAT	2	1	3
two	6	three	2	BG	3	1	4
two	6	two	2	GAT	4	0	4
two	6	one	2	Sound GAT	2	1	3
one	7	one	3	BG	12	4	16
one	7	three	3	GAT	2	0	2
one	7	two	3	Sound GAT	1	2	3
two	7	one	3	BG	3	1	4
two	7	three	3	GAT	2	0	2
two	7	two	3	Sound GAT	0	0	0
one	8	two	3	BG	6	2	8
one	8	one	3	GAT	3	0	3
one	8	three	3	Sound GAT	2	0	2
two	8	two	3	BG	6	2	8
two	8	one	3	GAT	1	0	1
two	8	three	3	Sound GAT	1	2	3
one	9	three	3	BG	1	0	1
one	9	two	3	GAT	1	0	1
one	9	one	3	Sound GAT	2	2	4
two	9	three	3	BG	4	2	6
two	9	two	3	GAT	3	0	3
two	9	one	3	Sound GAT	0	0	0
one	10	one	4	BG	4	3	7
one	10	three	4	GAT	0	0	0
one	10	two	4	Sound GAT	2	4	6
two	10	one	4	BG	10	4	14
two	10	three	4	GAT	2	0	2
two	10	two	4	Sound GAT	2	1	3
one	11	two	4	BG	5	2	7
one	11	one	4	GAT	2	0	2
one	11	three	4	Sound GAT	0	2	2
two	11	two	4	BG	4	5	9
two	11	one	4	GAT	0	0	0
two	11	three	4	Sound GAT	0	2	2
one	12	three	4	BG	4	3	7
one	12	two	4	GAT	1	0	1
one	12	one	4	Sound GAT	2	10	12
two	12	three	4	BG	2	3	5
two	12	two	4	GAT	1	0	1
two	12	one	4	Sound GAT	2	1	3
one	13	one	5	BG	0	0	0
one	13	three	5	GAT	1	0	1
one	13	two	5	Sound GAT	0	1	1
two	13	one	5	BG	3	2	5
two	13	three	5	GAT	1	0	1
two	13	two	5	Sound GAT	0	1	1
one	14	two	5	BG	7	3	10
one	14	one	5	GAT	2	0	2
one	14	three	5	Sound GAT	2	0	2
two	14	two	5	BG	9	4	13
two	14	one	5	GAT	1	0	1
two	14	three	5	Sound GAT	0	1	1
one	15	three	5	BG	11	4	15
one	15	two	5	GAT	4	1	5
one	15	one	5	Sound GAT	3	29	32
two	15	three	5	BG	11	6	17
two	15	two	5	GAT	1	0	1
two	15	one	5	Sound GAT	0	4	4
